# Supplementary material for: Rapeseed Oil as Feedstock for Bio-Based Thermoset Foams Obtained via Michael Addition Reaction
Source: MDPI journal article supplement (doi:10.3390/polym16010117), 2023-12-29
Supplement: s1 [file s1]

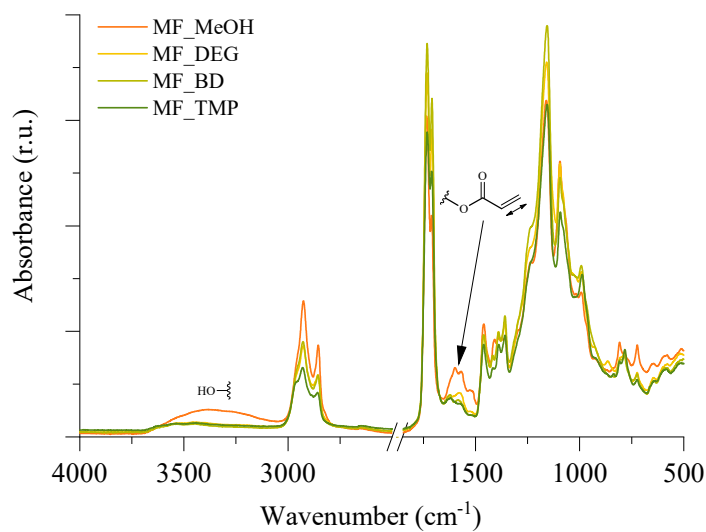

**Figure S1.** FTIR spectra of RO-based thermoset foams

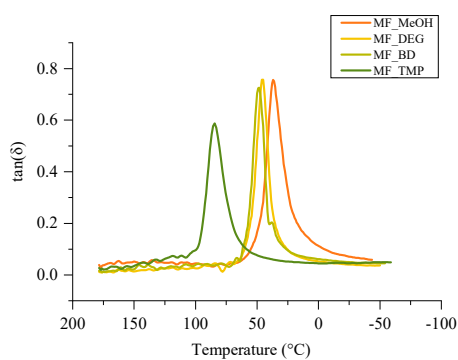

**Figure S2.**  $\tan(\delta)$  of the cooling cycle of DMA analysis for RO-based thermoset foams
